# Supplementary material
Source: PubMed Central journal article supplement (PMC3870763)
Supplement: 1317002110_pnas.201317002SI.pdf [file 1317002110_pnas.201317002SI.pdf]

# Supporting Information

Lewis et al. 10.1073/pnas.1317002110

## SI Methods

**Cell Culture.** Sf9 cells were used for baculovirus generation and protein expression. The cells were grown at 28 °C in a suspension culture using Sf-900 II SFM (Invitrogen), supplemented with 0.1% pluronic acid (Sigma). A stable *Drosophila* cell line (648-1B6) expressing luciferase under the control of the drosomycin promoter was established from S2 cells (Invitrogen) and was a kind gift from Jean-Luc Imler (Institut de Biologie Moléculaire et Cellulaire, Strasbourg, France) (1). These cells were grown at 28 °C in Express Five SFM (Invitrogen), supplemented with 2 mM L-glutamine, 1% penicillin/streptomycin, and 0.5 μM puromycin. HEK293ET (human embryonic kidney 293 EBNA-T) cells were grown at 37 °C (5% CO<sub>2</sub>, 100% humidity) in DMEM (Invitrogen), supplemented with 10% (vol/vol) FCS (Invitrogen) and 2 mM L-glutamine.

**Luciferase Assay.** S2 cells were placed into 96-well plates and stimulated overnight by the addition of purified recombinant Spätzle (Spz) (or mutant Spz) to the culture medium. Cells were lysed using Passive Lysis buffer (Promega), and the activity was measured using a GloMax luminometer (Promega) immediately after the addition of the D-Luciferin substrate (Biosynth). All assays were performed three times in triplicate. Data are shown as mean ± SD of the mean.

**Sedimentation Velocity Analytical Ultracentrifugation.** All analytical ultracentrifugation experiments were performed on an Optima XL-A/I (Beckman Coulter) centrifuge equipped with a four-hole titanium rotor, double-sector centerpieces, and an interference optical system for data acquisition. Sedimentation velocity runs were performed at 45,000 rpm with 3-min intervals between scans for a total of 190 scans at 20 °C. The sample volume was 400 μL. Data were analyzed using Sedfit software (2). The partial specific volumes, buffer density, and viscosity were estimated using SEDNTERP software (3).

**Isothermal Titration Calorimetry.** Measurements were carried out using a Microcal ITC 200 microcalorimeter at 25 °C by injecting C106 at a concentration of 524 μM into the measuring cell containing Toll<sub>N13</sub>-VLR construct at a concentration of 46.2 μM. In the reverse setup, Toll<sub>N13</sub>-VLR at a concentration of 392 μM was injected into C106 at a concentration of 17 μM. Twenty 2-μL injections were made at 3-min intervals into a cell containing 300 μL at a stirring speed of 300 rpm. Data were subsequently imported into ORIGIN software and processed as recommended by the manufacturer. Protein concentrations were determined by amino acid analysis for maximum accuracy.

**Mass Spectrometry.** Protein samples were buffer exchanged into 200 mM ammonium acetate, pH 6.9, using micro bio-spin chromatography columns (Bio-Rad). A nano-electrospray ionization source was used to infuse samples into the LCT Premier mass

spectrometer (Micromass U.K. Ltd./Waters Corp.) via in-house fabricated gold-palladium-coated borosilicate capillaries using a voltage of 1.8 kV at 10 μM protein concentration. The following instrument parameters were used: cone voltage 30 V, source temperature 80 °C. Data were processed by the use of MassLynx v.4.1 software supplied with the mass spectrometer. The instrument was calibrated using a separate introduction of aqueous CsI at 1 mg/mL.

**Data Collection, Phase Determination, and Model Refinement.** The best dataset was collected at a resolution of 2.3 Å at beamline I24 of the Diamond light source Synchrotron Facility (DLS, Didcot, UK). Oscillation images were recorded at 0.15° over 360 degrees using a Pilatus detector and a beam width of 50 μm. These were integrated, and reflection intensities were merged using the XDS package (4) and scaled using Aimless (5). Only 1,800 (270°) were used during scaling to minimize the effect of radiation damage.

The data were severely anisotropic and required ellipsoidal truncation and anisotropic scaling using the diffraction anisotropy server (6) on the XDS processed data. The spread in values of the three principle components was 28.07 Å<sup>2</sup>. In decreasing order, the three components were 17.42, -7.77, and -10.65 Å<sup>2</sup>. The resolution limits at which F/sigma dropped below an arbitrary cutoff of 3.0 were 2.3 Å along a\* and c\* and, 3.2 Å along b\*. Out of 162,698 reflections 35,925 were discarded because they fell outside the specified ellipsoid with dimensions 1/2.3, 1/3.2, 1/2.3 Å<sup>-1</sup> along a\*, b\*, and c\*, respectively. These discarded reflections had an average F/sigma of 0.18. Then, 126,773 reflections remained after ellipsoidal truncation. Anisotropic scale factors were then applied to remove anisotropy from the dataset. Lastly, an isotropic B of -25.19 Å<sup>2</sup> was applied to restore the magnitude of the high-resolution reflections diminished by anisotropic scaling.

Molecular replacement (MR) was undertaken using Phaser (7), with models that were improved using Phenix Morph (8). The initial ligand model was taken from the crystal structure of refolded Spz (9) whereas the receptor models were based on the crystal structure of Toll<sub>N6</sub>-VLR (10, 11), a homology model for Toll residues 229–399 based on the crystal structure of the Nogo receptor (12, 13), and the VLR leucine-rich repeat C-terminal domain (LRRCT) cap originally used by Kim et al. (14). Structure solutions by MR with Spz C106 had C-alpha clashes in the wings and were rejected in the packing test unless the wings were deleted.

Refinement was carried out using Refmac (15), Phenix Refine (8), and Buster (16). Despite the anisotropically scaled data, no extra density was found for the missing 12% amino acids of the complex. Expanding data to P1 and doubling the ASU did not yield better electron density. The R-factors reached suggest that these atoms are not ordered in the crystal. The quality of the structure was assessed with Molprobtity (17).

1. LeMosy EK, Tan YQ, Hashimoto C (2001) Activation of a protease cascade involved in patterning the *Drosophila* embryo. *Proc Natl Acad Sci USA* 98(9):5055–5060.
2. Schuck P (2000) Size-distribution analysis of macromolecules by sedimentation velocity ultracentrifugation and lamm equation modeling. *Biophys J* 78(3):1606–1619.
3. Laue TM, Shah BD, Ridgeway TM, Pelletier SL (1992) Computer-aided interpretation of analytical sedimentation data for proteins. *Analytical Ultracentrifugation in Biochemistry and Polymer Science*, eds Harding SE, Rowe AJ, Horton JC (Royal Society of Chemistry, Cambridge, UK), pp 90–125.
4. Kabsch W (2010) Xds. *Acta Crystallogr D Biol Crystallogr* 66:125–132.

5. Anonymous; Collaborative Computational Project, Number 4 (1994) The CCP4 suite: Programs for protein crystallography. *Acta Crystallogr D Biol Crystallogr* 50(Pt 5): 760–763.
6. Strong M, et al. (2006) Toward the structural genomics of complexes: Crystal structure of a PE/PPE protein complex from *Mycobacterium tuberculosis*. *Proc Natl Acad Sci USA* 103(21):8060–8065.
7. McCoy AJ, et al. (2007) Phaser crystallographic software. *J Appl Cryst* 40(Pt 4):658–674.
8. Adams PD, et al. (2010) PHENIX: A comprehensive Python-based system for macromolecular structure solution. *Acta Crystallogr D Biol Crystallogr* 66(Pt 2):213–221.



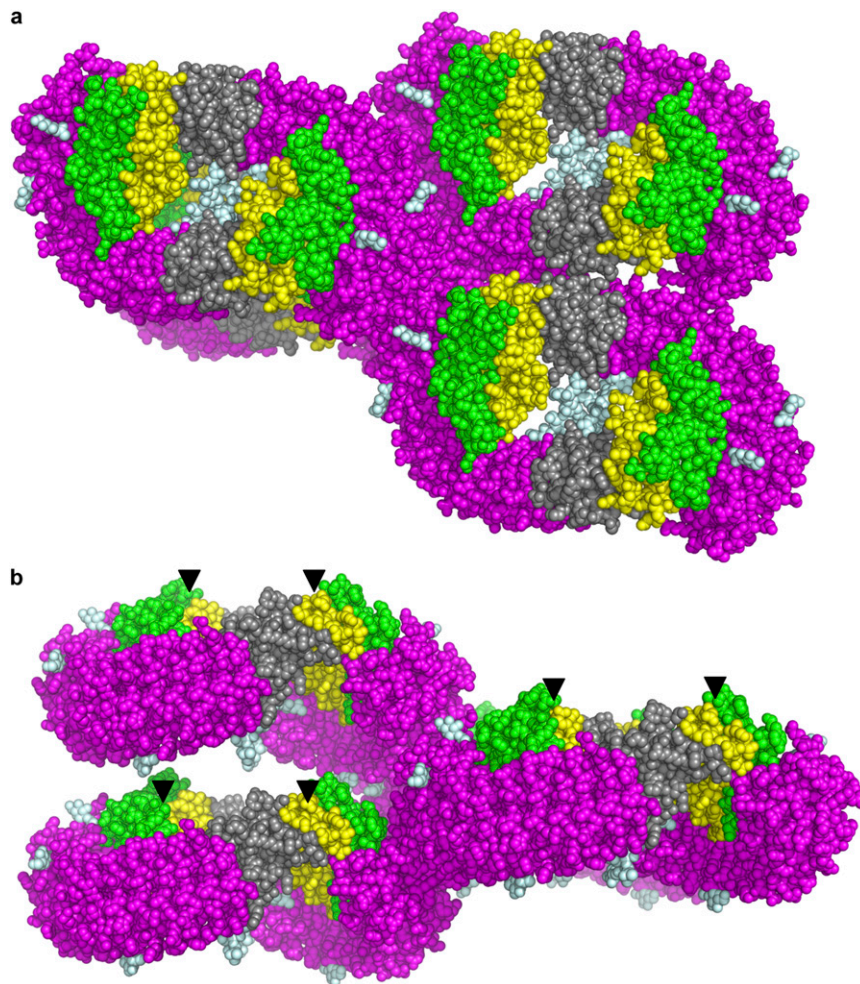

**Fig. 52.** Crystal packing leaves channels able to accommodate the invisible lobes of Spz. (A) Top view along the twofold axis and (B) a 90° rotated side view of the crystal packing with surface representations of Toll<sub>N13</sub>-VLR shown in magenta and gray and Spz dimer in yellow and green, respectively. Glycan structures are depicted in pale cyan spheres. Although the packing is dense (solvent content 50% assuming 724 residues), the side view orientation possesses suitable gaps to fit the missing Spz loops (indicated as black triangles).

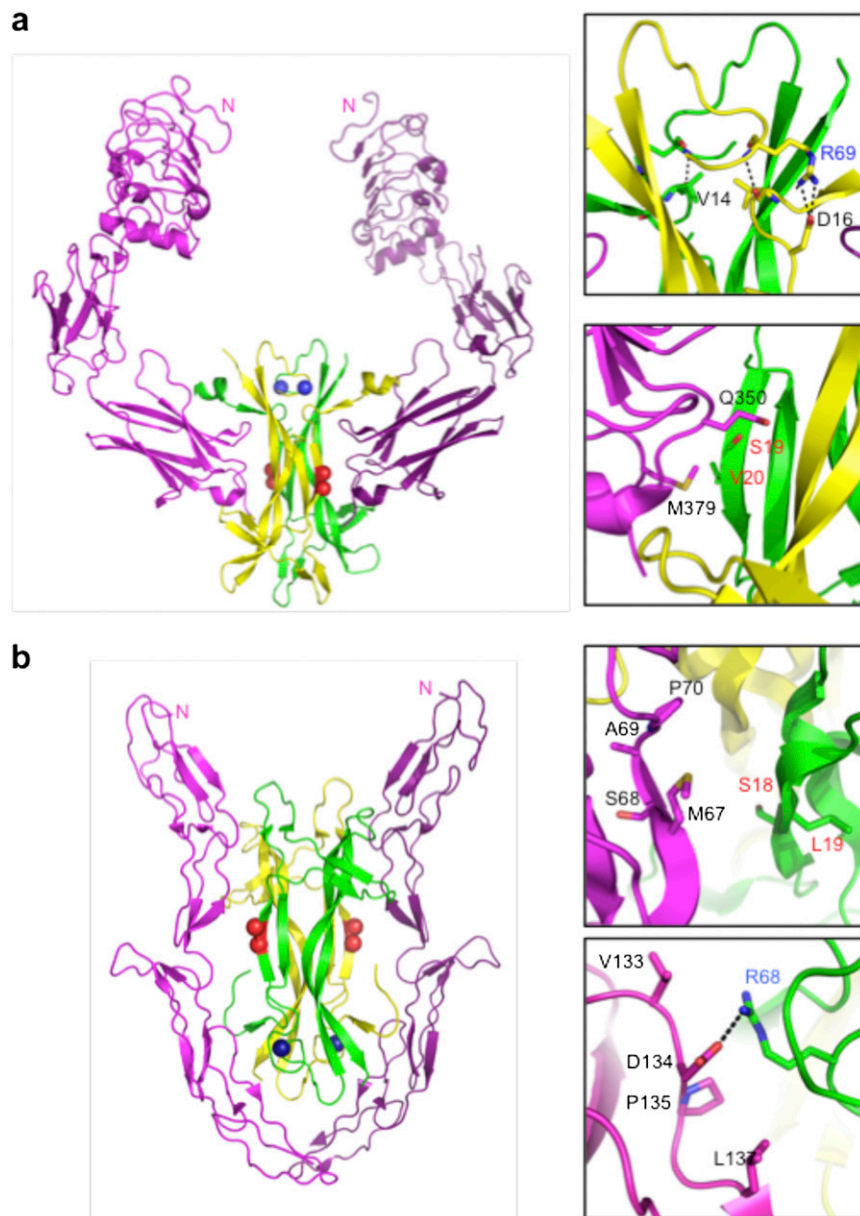

**Fig. S3.** Binding mode of mammalian neurotrophins. Schematic representation of receptors in magenta and growth factors in green and yellow. Red spheres represent residues equivalent to Spz R14/K15:S19/V20 in NGF; and, S18/ L19 in NT3. Blue spheres show the location of the residues that align with Spz D55:R69 in NGF; and R68 in NT3. (A) hNGF dimer bound to tyrosine receptor kinase hTrkA in a 1:2 stoichiometry (1). R69 stabilizes the NGF dimer without any involvement in TrkA receptor binding. S19/V20 in each protomer interact with receptor in a symmetric complex. (B) hNT3 dimer bound to neurotrophin receptor p75<sup>NTR</sup> in a 1:2 stoichiometry (2). Note that the orientation of bound NT3 is head up compared with NGF depicted above. This binding mode involves both areas S18/L19 as part of a hydrophobic patch and R68 in a salt bridge with D134.

- Wehrman T, et al. (2007) Structural and mechanistic insights into nerve growth factor interactions with the TrkA and p75 receptors. *Neuron* 53(1):25–38.
- Gong Y, Cao P, Yu HJ, Jiang T (2008) Crystal structure of the neurotrophin-3 and p75NTR symmetrical complex. *Nature* 454(7205):789–793.

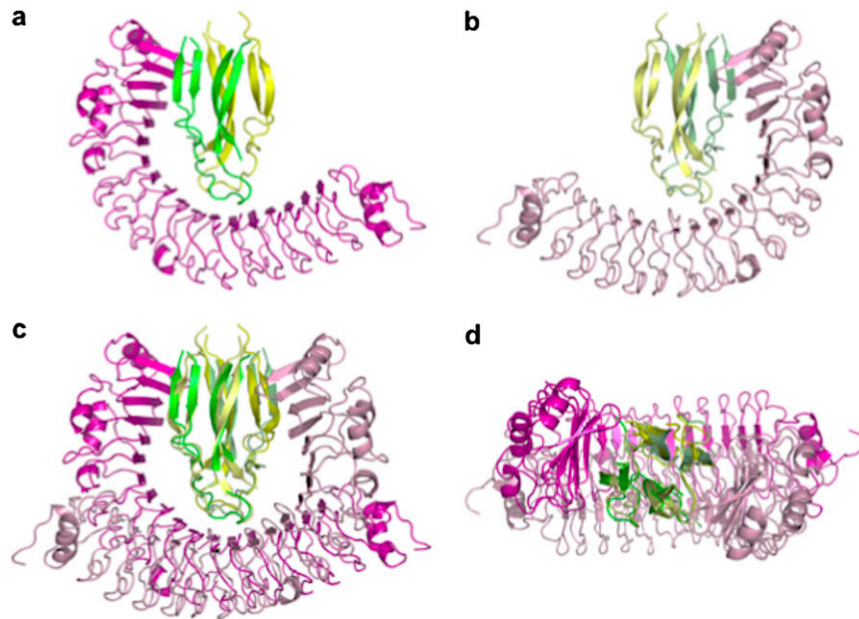

**Fig. S4.** The crystal structure of Spz-bound Toll<sub>N13</sub>-VLR is not compatible with a symmetrical 2:1 complex similar to mammalian neurotrophin receptor complexes. Spz chain L of complex (A) is aligned with Spz chain M of complex (B) to form C and D, which are side and top views, respectively, of the clashing Toll dimer in an impossible 2:1 complex. The superposition and graphics were generated using Pymol (1).

1. DeLano WL (2002) *The PyMOL Molecular Graphics System* (DeLano Scientific, San Carlos, CA).



**Table S2. Hydrogen bonds in Toll-Spz complex**

|    | Toll <sub>N13</sub> -VLR chain R | Distance, Å | Spz chains M and L |
|----|----------------------------------|-------------|--------------------|
| 1  | R:ARG 105[ NH1]                  | 2.76        | M:GLY 0[ O ]       |
| 2  | R:GLN 103[ NE2]                  | 3.53        | M:VAL 1[ O ]       |
| 3  | R:ARG 101[ NH2]                  | 2.54        | M:GLY 2[ O ]       |
| 4  | R:ARG 101[ NE ]                  | 3.05        | M:SER 4[ OG ]      |
| 5  | R:ARG 105[ NH2]                  | 2.83        | M:SER 12[ O ]      |
| 6  | R:ARG 66[ NH1]                   | 3.64        | M:ARG 14[ O ]      |
| 7  | R:GLN 44[ NE2]                   | 3.66        | M:TYR 18[ OH ]     |
| 8  | R:ARG 106[ NE ]                  | 3.3         | M:GLU 48[ OE2]     |
| 9  | R:ARG 182[ NH1]                  | 2.77        | M:ASP 55[ OD1]     |
| 10 | R:ARG 304[ NH2]                  | 3.36        | M:ALA 58[ O ]      |
| 11 | R:ASN 302[ ND2]                  | 3.31        | M:ASN 59[ O ]      |
| 12 | R:ASN 302[ ND2]                  | 2.96        | M:ASN 59[ OD1]     |
| 13 | R:ARG 304[ NH1]                  | 3.08        | M:PHE 60[ O ]      |
| 14 | R:ARG 304[ NH2]                  | 2.88        | M:PHE 60[ O ]      |
| 15 | R:GLU 180[ OE2]                  | 2.73        | M:ARG 7[ NH1]      |
| 16 | R:GLU 61[ OE2]                   | 3.19        | M:LYS 15[ NZ ]     |
| 17 | R:MET 301[ SD ]                  | 3.88        | M:ASN 59[ ND2]     |
| 18 | R:ARG 304[ O ]                   | 3.16        | M:GLN 62[ NE2]     |
| 19 | R:ARG 299[ NH1]                  | 2.79        | L:PHE 60[ O ]      |
| 20 | R:ASN 227[ ND2]                  | 2.98        | L:GLN 62[ O ]      |
| 21 | R:ILE 250[ N ]                   | 3.12        | L:GLN 62[ OE1]     |
| 22 | R:GLN 225[ NE2]                  | 2.85        | L:GLN 62[ OE1]     |
| 23 | R:ASP 251[ N ]                   | 3.76        | L:GLN 62[ OE1]     |
| 24 | R:MET 49[ N ]                    | 2.75        | L:GLN 74[ OE1]     |
| 25 | R:ASP 251[ OD2]                  | 2.74        | L:GLN 62[ N ]      |
| 26 | R:ILE 250[ O ]                   | 3           | L:GLN 62[ NE2]     |
| 27 | R:GLU 203[ OE1]                  | 2.79        | L:TYR 64[ OH ]     |
| 28 | R:PRO 47[ O ]                    | 3.18        | L:GLN 74[ NE2]     |

**Table S3. Salt bridges in Toll-Spätzle complex**

|    | Toll <sub>N13</sub> -VLR chain R | Distance, Å | Spz chain M    |
|----|----------------------------------|-------------|----------------|
| 1  | R:ARG 105[ NH2]                  | 3.44        | M:GLU 48[ OE1] |
| 2  | R:ARG 105[ NE ]                  | 3.97        | M:GLU 48[ OE2] |
| 3  | R:ARG 105[ NH2]                  | 3.7         | M:GLU 48[ OE2] |
| 4  | R:ARG 106[ NE ]                  | 3.3         | M:GLU 48[ OE2] |
| 5  | R:ARG 106[ NH2]                  | 3.8         | M:GLU 48[ OE2] |
| 6  | R:ARG 182[ NH1]                  | 2.77        | M:ASP 55[ OD1] |
| 7  | R:ARG 182[ NH2]                  | 3.7         | M:ASP 55[ OD2] |
| 8  | R:ARG 182[ NH1]                  | 3.15        | M:ASP 55[ OD2] |
| 9  | R:GLU 180[ OE1]                  | 2.98        | M:ARG 7[ NH1]  |
| 10 | R:GLU 180[ OE2]                  | 2.73        | M:ARG 7[ NH1]  |
| 11 | R:GLU 180[ OE2]                  | 3.74        | M:ARG 7[ NH2]  |
| 12 | R:GLU 53[ OE2]                   | 3.15        | M:ARG 14[ NE ] |
| 13 | R:GLU 53[ OE1]                   | 3.92        | M:ARG 14[ NE ] |
| 14 | R:GLU 51[ OE1]                   | 3.36        | M:ARG 14[ NH1] |
| 15 | R:GLU 51[ OE1]                   | 3.17        | M:ARG 14[ NH2] |
| 16 | R:GLU 61[ OE2]                   | 3.19        | M:LYS 15[ NZ ] |

**Table S4. Isothermal titration calorimetry on Toll<sub>N13</sub>-VLR-Spz C106**

| Syringe                 |                              | Cell                    |                              |          |                      | Experimental values         |                              |                             |
|-------------------------|------------------------------|-------------------------|------------------------------|----------|----------------------|-----------------------------|------------------------------|-----------------------------|
| Protein                 | Concentration, $\mu\text{M}$ | Protein                 | Concentration, $\mu\text{M}$ | <i>N</i> | <i>K<sub>D</sub></i> | $\Delta\text{H}$ , kcal/mol | $\Delta\text{S}$ , cal/mol/K | $\Delta\text{G}$ , kcal/mol |
| C106                    | 524                          | Toll <sub>N13</sub> VLR | 46                           | 0.96     | $33.6 \pm 0.3$       | -13.2                       | -10.3                        | -10.2                       |
| C106                    | 297                          | Toll <sub>N13</sub> VLR | 36                           | 1.01     | $56.8 \pm 0.2$       | -13.9                       | -13.7                        | -9.9                        |
| Toll <sub>N13</sub> VLR | 392                          | C106                    | 17                           | 1.09     | $50.5 \pm 0.1$       | -7.0                        | 9.97                         | -4.0                        |

Purified Spz C106 was titrated into the ITC measuring cell containing Toll<sub>N13</sub>-VLR protein resulting in the formation of a complex of one truncated ectodomain binding a single Spz dimer with a dissociation constant between 30 and 50 nM (depending on the protein preparation) comparable with the affinity of full-length ectodomain (1). In the reciprocal titration in which Toll<sub>N13</sub>-VLR was injected into Spz C106, a complex with the same stoichiometry and dissociation constant was observed. A summary table of the thermodynamic parameters is shown.

1. Weber AN, Moncrieffe MC, Gangloff M, Imler JL, Gay NJ (2005) Ligand-receptor and receptor-receptor interactions act in concert to activate signaling in the *Drosophila* toll pathway. *J Biol Chem* 280(24):22793-22799.

**Table S5. Cloning and mutagenesis primers**

|                                | Sequence (5'-3')                                                                                               | Orientation | <i>T<sub>m</sub></i> , °C |
|--------------------------------|----------------------------------------------------------------------------------------------------------------|-------------|---------------------------|
| <b>Cloning</b>                 |                                                                                                                |             |                           |
| Toll(BamHI-Met1)               | act acg gat cca tga gtc gac taa agg gct cc                                                                     | Forward     | 78                        |
| Toll(Leu228-NheI)              | Tag cta gct agc aaa ttg agc tgc ttc agc tt                                                                     | Reverse     | 74                        |
| Toll(Leu397-NheI)              | Tag cta gct agc cag acg cag atc cgt cag                                                                        | Reverse     | 76                        |
| Toll(Ile723-NheI)              | TGC TAG CTA GCT ATA TCC AAA TGG GTG AGA TT                                                                     | Reverse     | 69                        |
| Toll (NheI-Asp231)             | TAG CTA GCT AGC AAT CAA CTG CAC AAC CTC ACC                                                                    | Forward     | 74                        |
| Toll (Aln801-AgeI)             | ACT ACC GGT CGC CGG ACA AAT GTC GTT GGT                                                                        | Reverse     | 80                        |
| VLR(NheI-Asn133)               | Ata gct agc aac cag ctg aag tct gtt cct gat ggg att ttt<br>gat cgc ctg acc agc ttg cag aaa att tgg ctt cat aca | Forward     | 91                        |
| <b>VLR(Thr200-AgeI)</b>        |                                                                                                                |             |                           |
| Fc (AgeI-TEV-E45)*             | act acc ggt gaa aac ctg tat ttt cag ggc gag cccc aaa tct tgt gac aaa                                           | Forward     | 85                        |
| Fc(K276-XbaI-Hisx6-STOP- NotI) | atc cag cgg ccg cct agt gat ggt gat ggt gat ggt g                                                              | Reverse     | 88                        |
| <b>Mutagenesis</b>             |                                                                                                                |             |                           |
| Spz R14A/K15A                  | CCT TTG CAG GAG CAT CGC GGC GCT GGT GTA CCC AAA AAA GGG C                                                      | Forward     | 88                        |
| Spz D55R                       | GAA GGA GCG GAT CAA CCC TGT CGC TTC GCC GCC AAC TTT C                                                          | Forward     | 82                        |



**Table S6. X-ray diffraction data collection and refinement statistics**

| Data collection                      |                                |
|--------------------------------------|--------------------------------|
| Space group                          | C2                             |
| Cell parameters                      |                                |
| a, b, c, Å                           | 198.2, 57.2, 70.5              |
| $\alpha, \beta, \gamma, ^\circ$      | 90.0, 97.8, 90.0               |
| Resolution, Å                        | 43.97–2.35 (2.43–2.35)*        |
| No. of observations                  | 164,263 (126,773) <sup>†</sup> |
| No. of unique reflections            | 32,800 (32,505) <sup>†</sup>   |
| $R_{\text{merge}}, \%$ <sup>‡</sup>  | 0.102                          |
| $R_{\text{merge}}, \%$ <sup>‡</sup>  | 0.082 (0.783) <sup>†</sup>     |
| $I/\sigma(I)$                        | 7.5                            |
| $I/\sigma(I)$ <sup>†</sup>           | 11.5 (2.6) <sup>†</sup>        |
| Completeness, %                      | 99.7 (99.9)*                   |
| Completeness, % <sup>†</sup>         | 74.8 (32.9) <sup>†</sup>       |
| Mean multiplicity                    | 5.0 (5.2)*                     |
| Mean multiplicity <sup>†</sup>       | 3.9 (1.9) <sup>†</sup>         |
| Refinement                           |                                |
| Resolution, Å                        | 49.12–2.35                     |
| No. of reflections (total)           | 24,588                         |
| No. of reflections (test)            | 1,256                          |
| $R_{\text{work}}, \%$ <sup>§</sup>   | 19.5                           |
| $R_{\text{free}}, \%$ <sup>¶</sup>   | 22.7                           |
| No. of atoms                         | 4,934                          |
| Protein                              | 4,576                          |
| Heterogen atoms                      | 254                            |
| Solvent atoms                        | 104                            |
| Mean B, Å <sup>2</sup>               | 59.7                           |
| rmsd                                 |                                |
| Bond lengths, Å                      | 0.01                           |
| Bond angles, °                       | 1.11                           |
| Molprobrity                          |                                |
| Clashscore, all atoms                | 3.1 (100th percentile)         |
| Ramachandran favored, %              | 93.7                           |
| Ramachandran outliers, %             | 0.5                            |
| Cruickshank DPI                      |                                |
| Based on $R_{\text{work}}, \text{Å}$ | 0.482                          |
| Cruickshank DPI                      |                                |
| Based on $R_{\text{free}}, \text{Å}$ | 0.260                          |

\*Numbers in parentheses refer to the highest resolution shell.

<sup>†</sup>Statistics after elliptical truncation prompted by severe anisotropy.

<sup>‡</sup> $R_{\text{merge}} = \sum hkl (\sum i (|hkl, i| - \langle |hkl| \rangle)) / \sum hkl, i \langle |hkl| \rangle$ , with  $|hkl, i|$  the intensity of an individual measurement of the reflection with Miller indices  $h, k$  and  $l$ , and  $\langle |hkl| \rangle$  the mean intensity of that reflection. Value calculated for  $l > -3\sigma(l)$ .

<sup>§</sup> $R_{\text{work}} = \sum hkl (|F_{\text{obs}} hkl| - |F_{\text{calc}} hkl|) / |F_{\text{obs}} hkl|$ , where  $|F_{\text{obs}} hkl|$  and  $|F_{\text{calc}} hkl|$  are the observed and calculated structure factor amplitudes.

<sup>¶</sup> $R_{\text{free}}$  is calculated as  $R_{\text{work}}$  with 5% reflections omitted from the refinement process.
